# Supplementary material for: Persistence of SARS-CoV-2 antibodies over 18 months following infection: UK Biobank COVID-19 Serology Study
Source: PubMed Central journal article supplement (PMC10850672; doi:10.1136/jech-2023-220569), 2023-11-03
Supplement: jech-2023-220569supp001.pdf [file jech-2023-220569supp001.pdf]

## Supplementary Materials

Table S1: Characteristics of study participants

|                                               | All participants recruited |      | All participants who returned sample |     | Participants in IgG-S analyses |     | Participants in IgG-N analyses |     |
|-----------------------------------------------|----------------------------|------|--------------------------------------|-----|--------------------------------|-----|--------------------------------|-----|
|                                               | N                          | %    | N                                    | %   | N                              | %   | N                              | %   |
| <b>Age, years</b>                             |                            |      |                                      |     |                                |     |                                |     |
| <30                                           | 2 291                      | 11.3 | 2049                                 | 11  | 228                            | 15  | 126                            | 7   |
| 30-39                                         | 3 169                      | 15.7 | 2898                                 | 15  | 243                            | 16  | 168                            | 10  |
| 40-49                                         | 2 514                      | 12.4 | 2340                                 | 12  | 181                            | 12  | 143                            | 8   |
| 50-59                                         | 3 928                      | 19.5 | 3721                                 | 20  | 338                            | 22  | 505                            | 29  |
| 60-69                                         | 4 071                      | 20.2 | 3881                                 | 21  | 279                            | 18  | 460                            | 26  |
| 70+                                           | 4 222                      | 20.9 | 3998                                 | 21  | 245                            | 16  | 347                            | 20  |
|                                               |                            |      |                                      |     |                                |     |                                |     |
| <b>Gender</b>                                 |                            |      |                                      |     |                                |     |                                |     |
| Men                                           | 8 877                      | 44   | 8217                                 | 44  | 636                            | 42  | 764                            | 44  |
| Women                                         | 11 318                     | 56   | 10670                                | 57  | 878                            | 58  | 985                            | 56  |
|                                               |                            |      |                                      |     |                                |     |                                |     |
| <b>Ethnicity<sup>a</sup></b>                  |                            |      |                                      |     |                                |     |                                |     |
| White                                         | 17 626                     | 87.5 | 16476                                | 87  | 1 241                          | 82  | 1 391                          | 80  |
| Other ethnicity                               | 2 526                      | 12.5 | 2372                                 | 13  | 271                            | 18  | 354                            | 20  |
|                                               |                            |      |                                      |     |                                |     |                                |     |
| <b>Townsend Deprivation Index<sup>b</sup></b> |                            |      |                                      |     |                                |     |                                |     |
| Less Deprived                                 | 6 971                      | 34.5 | 6576                                 | 35  | 453                            | 30  | 571                            | 33  |
| Average                                       | 8 249                      | 40.8 | 7728                                 | 41  | 590                            | 39  | 715                            | 41  |
| More Deprived                                 | 4 975                      | 24.6 | 4583                                 | 24  | 471                            | 31  | 463                            | 27  |
|                                               |                            |      |                                      |     |                                |     |                                |     |
| <b>UK Region</b>                              |                            |      |                                      |     |                                |     |                                |     |
| East Midlands                                 | 1 201                      | 5.9  | 1133                                 | 6   | 76                             | 5   | 90                             | 5   |
| East of England                               | 938                        | 4.6  | 889                                  | 5   | 53                             | 4   | 60                             | 3   |
| London                                        | 6 059                      | 30   | 5631                                 | 30  | 637                            | 42  | 663                            | 38  |
| North East                                    | 832                        | 4.1  | 780                                  | 4   | 44                             | 3   | 63                             | 4   |
| North West                                    | 2 175                      | 10.8 | 2035                                 | 11  | 167                            | 11  | 205                            | 12  |
| Scotland                                      | 1 227                      | 6.1  | 1168                                 | 6   | 60                             | 4   | 70                             | 4   |
| South East                                    | 2 604                      | 12.9 | 2441                                 | 13  | 166                            | 11  | 193                            | 11  |
| South West                                    | 1 379                      | 6.8  | 1301                                 | 7   | 65                             | 4   | 87                             | 5   |
| Wales                                         | 791                        | 3.9  | 742                                  | 4   | 37                             | 2   | 56                             | 3   |
| West Midlands                                 | 1 407                      | 7    | 1301                                 | 7   | 113                            | 8   | 123                            | 7   |
| Yorkshire and The Humber                      | 1 582                      | 7.8  | 1466                                 | 8   | 96                             | 6   | 139                            | 8   |
|                                               |                            |      |                                      |     |                                |     |                                |     |
| <b>All</b>                                    | 20 195                     | 100  | 18 887                               | 100 | 1514                           | 100 | 1 749                          | 100 |

IgG-S antibody analyses restricted to SARS-CoV-2 cases with one or more IgG-S tests following diagnosis. IgG-N antibody analyses restricted to SARS-CoV-2 cases with IgG-N test following diagnosis. <sup>a</sup>Excludes participants of unknown ethnicity. <sup>b</sup>Area-level derived measure of socio-economic deprivation (categories are defined as: <-2 (less deprived), -2 to <2

Table S2: Proportion of SARS-CoV-2 cases seropositive for IgG-S antibodies at 6 months following infection

|                                               | SARS-CoV-2 cases, n | Positive for IgG-S antibodies, n | Proportion positive for IgG-S antibodies, % (95% CI) | $\chi^2$ |
|-----------------------------------------------|---------------------|----------------------------------|------------------------------------------------------|----------|
| <b>Age, years</b>                             |                     |                                  |                                                      |          |
| <30                                           | 140                 | 125                              | 89.3% (82.9% - 93.9%)                                |          |
| 30-39                                         | 181                 | 169                              | 93.4% (88.7% - 96.5%)                                |          |
| 40-49                                         | 138                 | 123                              | 89.1% (82.7% - 93.8%)                                |          |
| 50-59                                         | 256                 | 239                              | 93.4% (89.6% - 96.1%)                                |          |
| 60-69                                         | 210                 | 194                              | 92.4% (87.9% - 95.6%)                                |          |
| 70+                                           | 175                 | 157                              | 89.7% (84.2% - 93.8%)                                | 0.44     |
| <b>Gender</b>                                 |                     |                                  |                                                      |          |
| Female                                        | 646                 | 599                              | 92.7% (90.4% - 94.6%)                                |          |
| Male                                          | 454                 | 408                              | 89.9% (86.7% - 92.5%)                                | 0.09     |
| <b>Ethnicity<sup>a</sup></b>                  |                     |                                  |                                                      |          |
| White                                         | 890                 | 812                              | 91.2% (89.2% - 93.0%)                                |          |
| Other ethnicity                               | 208                 | 193                              | 92.8% (88.4% - 95.9%)                                | 0.47     |
| <b>Townsend Deprivation Index<sup>b</sup></b> |                     |                                  |                                                      |          |
| Less deprived                                 | 338                 | 314                              | 92.9% (89.6% - 95.4%)                                |          |
| Average                                       | 422                 | 386                              | 91.5% (88.4% - 94.0%)                                |          |
| More deprived                                 | 340                 | 307                              | 90.3% (86.6% - 93.2%)                                | 0.47     |
| <b>All</b>                                    | 1 100               | 1 007                            | 91.5% (89.7% - 93.1%)                                |          |

Analyses among 1100 SARS-CoV-2 cases who had an IgG-S antibody test between 150-180 days following infection (mean 164 days; see Figure 2). <sup>a</sup>Excludes 2 participants of unknown ethnicity. <sup>b</sup>Area-level derived measure of socio-economic deprivation (categories are defined as: <-2 (less deprived), -2 to <2 (average), 2+ (more deprived)).

Table S3: Proportion of SARS-CoV-2 cases seropositive for IgG-N antibodies at 18 months after infection

|                                               | SARS-CoV-2 cases, n | Positive for IgG-N antibodies, n | Proportion positive for IgG-N antibodies, % (95% CI) | $\chi^2$ |
|-----------------------------------------------|---------------------|----------------------------------|------------------------------------------------------|----------|
| <b>Age, years</b>                             |                     |                                  |                                                      |          |
| <30                                           | 101                 | 66                               | 65.3% (55.2% - 74.5%)                                |          |
| 30-39                                         | 149                 | 107                              | 71.8% (63.9% - 78.9%)                                |          |
| 40-49                                         | 132                 | 94                               | 71.2% (62.7% - 78.8%)                                |          |
| 50-59                                         | 236                 | 178                              | 75.4% (69.4% - 80.8%)                                |          |
| 60-69                                         | 213                 | 158                              | 74.2% (67.8% - 79.9%)                                |          |
| 70+                                           | 191                 | 139                              | 72.8% (65.9% - 79.0%)                                | 0.54     |
| <b>Gender</b>                                 |                     |                                  |                                                      |          |
| Female                                        | 598                 | 434                              | 72.6% (68.8% - 76.1%)                                |          |
| Male                                          | 433                 | 311                              | 71.8% (67.3% - 76.0%)                                | 0.79     |
| <b>Ethnicity<sup>a</sup></b>                  |                     |                                  |                                                      |          |
| White                                         | 833                 | 591                              | 70.9% (67.7% - 74.0%)                                |          |
| Other ethnicity                               | 196                 | 152                              | 77.6% (71.1% - 83.2%)                                | 0.06     |
| <b>Townsend Deprivation Index<sup>b</sup></b> |                     |                                  |                                                      |          |
| Less deprived                                 | 322                 | 232                              | 72.0% (66.8% - 76.9%)                                |          |
| Average                                       | 415                 | 295                              | 71.1% (66.5% - 75.4%)                                |          |
| More deprived                                 | 294                 | 218                              | 74.1% (68.7% - 79.1%)                                | 0.66     |
| <b>All</b>                                    | 1 031               | 745                              | 72.3% (69.4% - 75.0%)                                |          |

Analyses among 1031 SARS-CoV-2 cases who had an IgG-N antibody test between 450-630

days following infection (i.e. the last time period analysed; see Figure 2) <sup>a</sup>Excludes 2

participants of unknown ethnicity. <sup>b</sup>Area-level derived measure of socio-economic

deprivation (categories are defined as: <-2 (less deprived), -2 to <2 (average), 2+ (more deprived)).

**Figure S1: Antibody persistence to the N antigen over an 18 month period in days since the first positive PCR test**

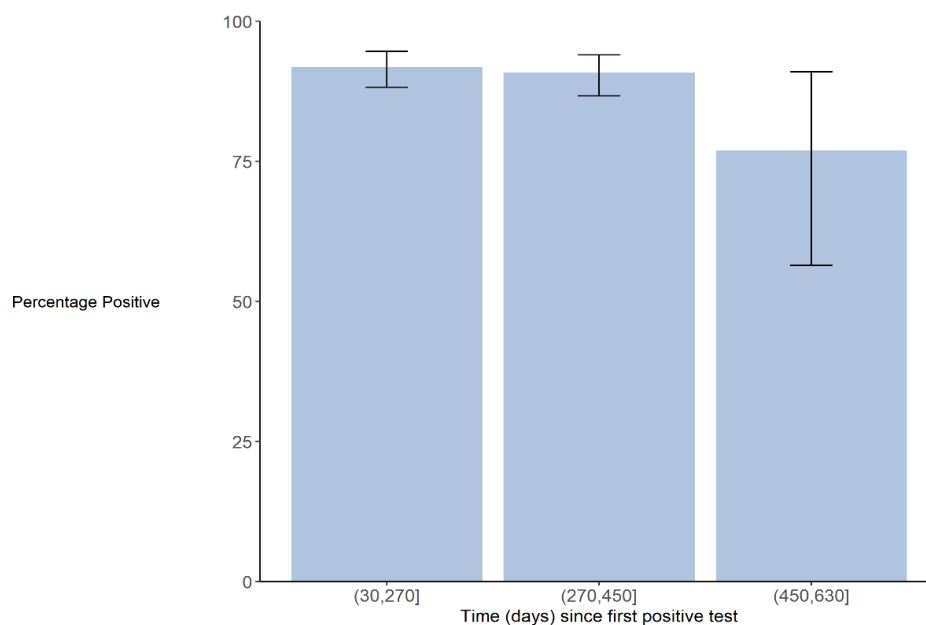

|             |             |             |             |
|-------------|-------------|-------------|-------------|
| Total, n    | 306         | 262         | 26          |
| Positive, n | 281         | 238         | 20          |
| %           | 91.8%       | 90.8%       | 76.9%       |
| 95% CI      | 88.2%-94.6% | 86.7%-94.0% | 56.4%-91.0% |
| Mean, days  | 92          | 362         | 540         |

Analyses among 674 SARS-CoV-2 cases with IgG-N test following diagnosis (78 individuals are omitted from the plot as they have a duration of follow up less than 30 days and a further 2 individuals are omitted from the plot as they exceed 630 days follow up post infection). Proportions are % (95% CI) of IgG-N seropositive cases among participants that returned a valid test during each period; participants provided one IgG-N test only. Figure shows the observed proportion with 95% confidence interval. The table below the figure shows the

number of participants in each bar, as well as the number positive and the % positive with 95% confidence interval. Date of infection was determined by PCR test. (30-270) represents upto 9 months, (270-450) represents 9 to 15 months, and (450-630] represents 15 to 21 months.
